# Supplementary material for: Different mechanisms of ultrafast excited state deactivation of coumarin 500 in dioxane and methanol solvents: experimental and theoretical study
Source: Royal Society of Chemistry journal article supplement (doi:10.1039/c4ra09773d), 2014-11-21
Supplement: c4ra09773d1.pdf [file c4ra09773d1.pdf]

## Supporting information

### Different Mechanisms of Ultrafast Excited State Deactivation of Coumarin 500 in Dioxane and Methanol Solvents: Experimental and Theoretical Study

Lin Cong, Hang Yin, Ying Shi\*, Mingxing Jin, Dajun Ding

Institute of Atomic and Molecular Physics, Jilin University, Changchun 130012, China

E-mail address: [shi\\_ying@jlu.edu.cn](mailto:shi_ying@jlu.edu.cn) (Ying Shi)

Tel: +86-431-85168817 Fax: +86-431-85168816

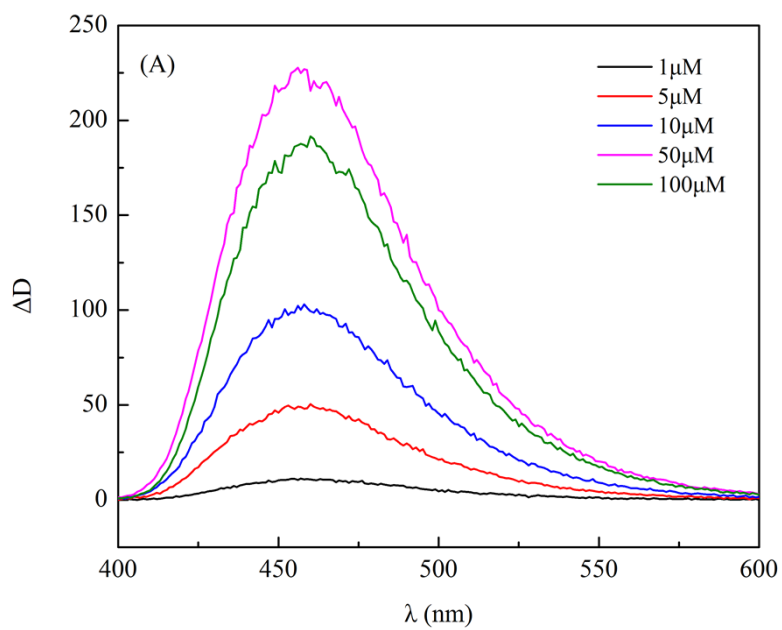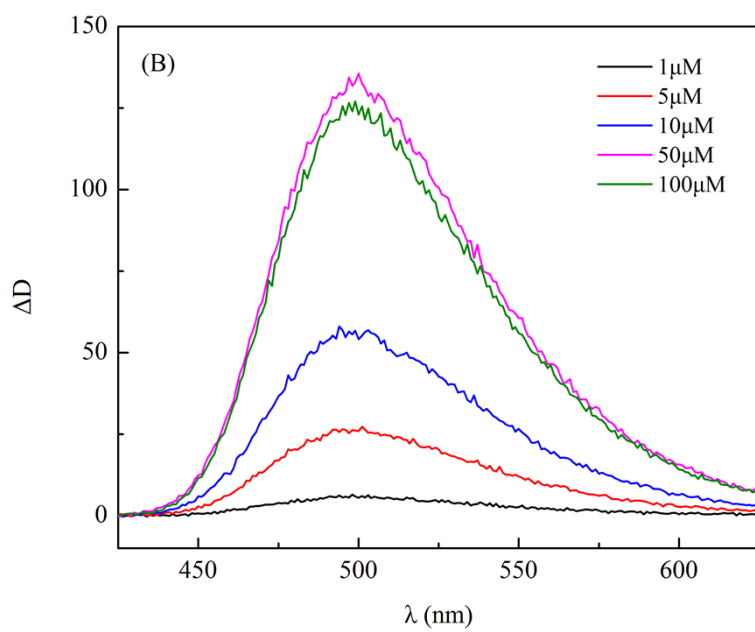

Figure S1. Fluorescence spectra of C500 in (A) Diox and (B) MeOH solvents at different concentrations.

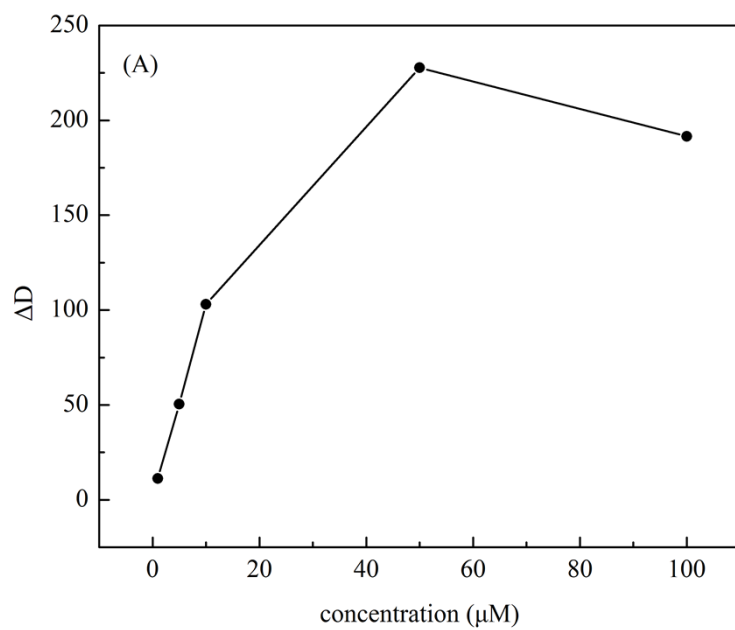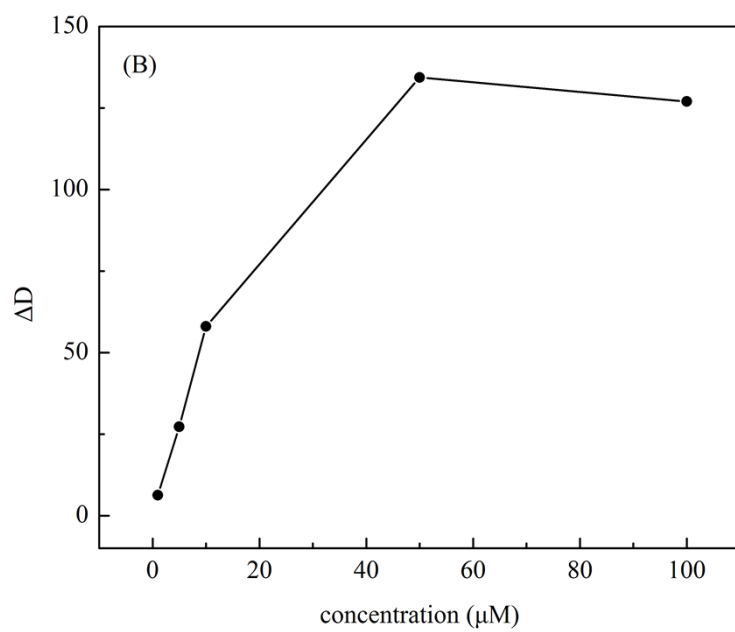

Figure S2. Intensity of the fluorescence as function of concentration in (A) Diox and (B) MeOH solvents.

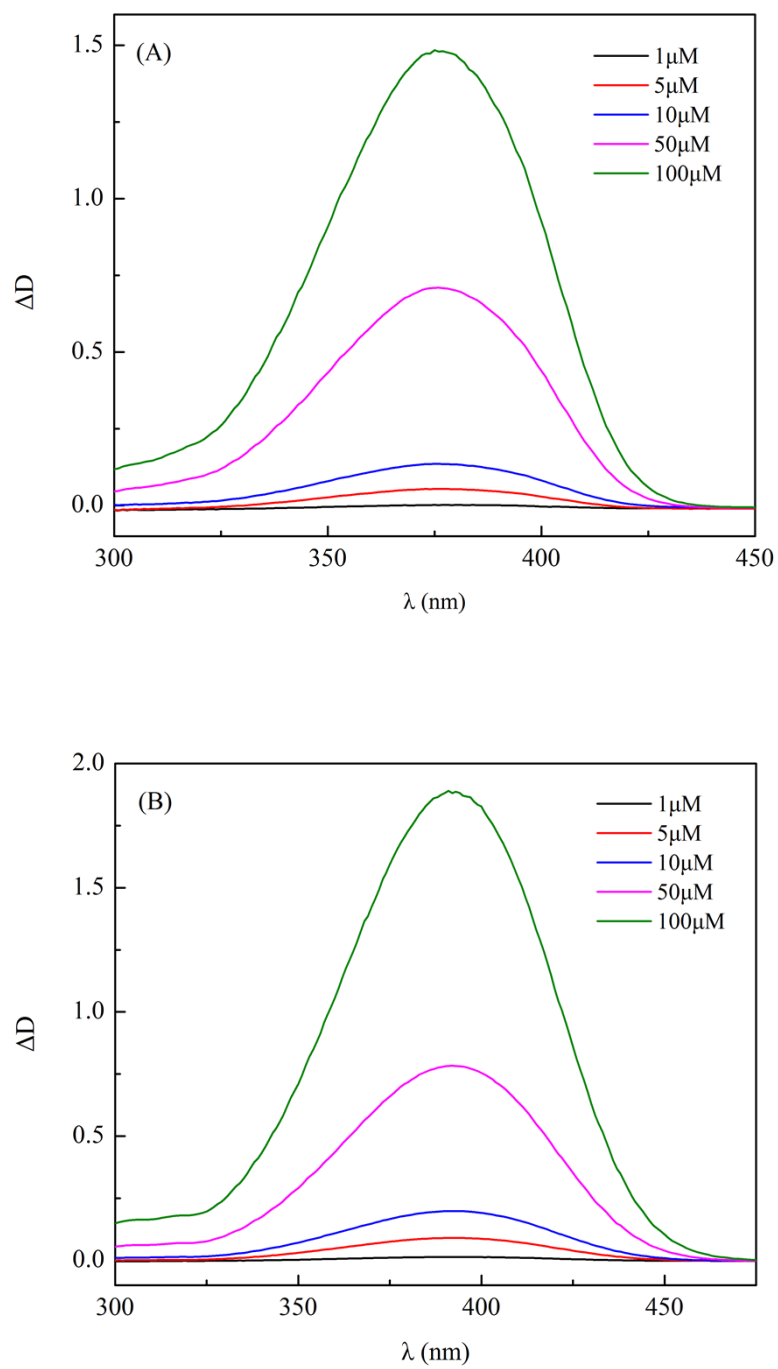

Figure S3. Absorption spectra of C500 in (A) Diox and (B) MeOH solvents at different concentrations.

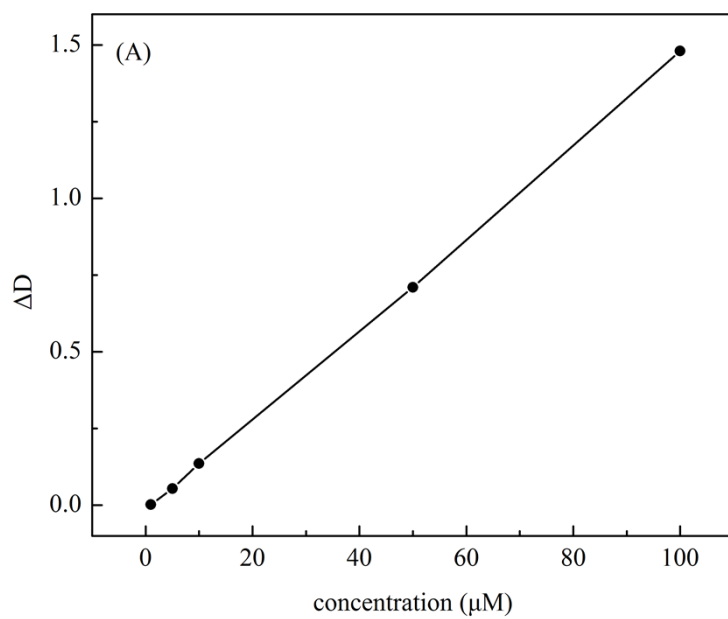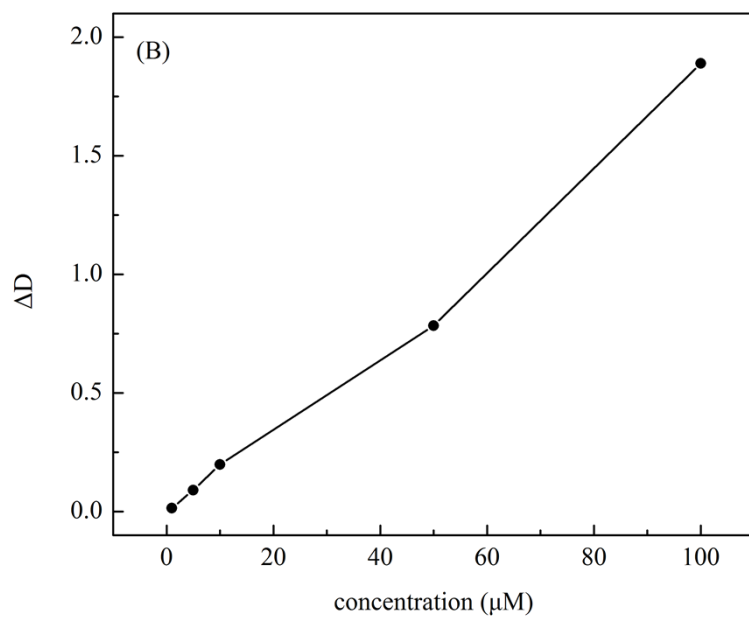

Figure S4. Absorption intensity variation with concentration in (A) Diox and (B) MeOH solvents.

| solvent | $\pi^*$ | $a$  | $b$  |
|---------|---------|------|------|
| Diox    | 0.55    | 0    | 0.37 |
| MeOH    | 0.6     | 0.93 | 0.62 |

Table S1. KT Parameters in Diox and MeOH solvents.

|                | C500        |             | C500-(MeOH) <sub>3</sub> |             |
|----------------|-------------|-------------|--------------------------|-------------|
|                | BP86(RI)    | CAM-B3LYP   | BP86(RI)                 | CAM-B3LYP   |
| S <sub>1</sub> | 413 (0.226) | 311 (0.485) | 511 (0.000)              | 309 (0.501) |
|                | H→L 86.4%   | H→L 68.8%   | H-1→L 96.1%              | H→L 68.7%   |
| S <sub>2</sub> | 345 (0.072) | 264 (0.004) | 420 (0.227)              | 264 (0.001) |
|                | H-1→L 87.0% | H-1→L 52.5% | H→L 84.2%                | H-1→L 56%   |

Table S2. Calculated electronic excitation energies (nm), the corresponding oscillation strengths and FMOs for hydrogen-bonded complexes C500 and C500-(MeOH)<sub>3</sub> in low-lying electronically excited states by BP86(RI) and CAM-B3LYP.
